# Supplementary material for: Synthesizing and communicating climate change impacts to inform coastal adaptation planning
Source: Atypon-hosted journal article supplement (doi:10.1139/facets-2019-0027), 2020-01-01
Supplement: facets-2019-0027_supplement2.pdf [file facets-2019-0027_supplement2.pdf]

North Coast of Vancouver Island - Summary table for climate impacts, projected changes and sectoral impacts

| Climate Impact          | Projected Changes                                                                                                                                                                                                                                                                                                                                                                                                                                                                                                                                                      | Evidence Quality | Sectoral Impacts                                                                                                                                                                                                                                                                                                                                                                                                                                                                                                                                                         | Impacts Summary <sup>a</sup>                                                          | Evidence Quality |
|-------------------------|------------------------------------------------------------------------------------------------------------------------------------------------------------------------------------------------------------------------------------------------------------------------------------------------------------------------------------------------------------------------------------------------------------------------------------------------------------------------------------------------------------------------------------------------------------------------|------------------|--------------------------------------------------------------------------------------------------------------------------------------------------------------------------------------------------------------------------------------------------------------------------------------------------------------------------------------------------------------------------------------------------------------------------------------------------------------------------------------------------------------------------------------------------------------------------|---------------------------------------------------------------------------------------|------------------|
| Air Temperature         | Average air temperatures may increase by 1.5°C (0.9°C to 2.3°C) by 2050 and 2.5°C (1.3°C to 3.7°C) by 2080 <sup>1,2</sup> and average air temperatures could reach as much as -8.5°C (low emissions, RCP2.6) to -12°C (high emissions, RCP8.5) by 2091-2100 <sup>3</sup> ;<br>Likely more growing degree days: 313 (+189 to +478) more growing degree days by 2050 and 521 (+270 to +832) more growing degree days by 2080 <sup>4</sup> ;<br>Likely more frost-free days: 23 (+13 to +35) more frost free days by 2050 and 35 more (+19 to +52) by 2080 <sup>4</sup> . | High             | Threats to fisheries <sup>5</sup> , fish stocks and species distribution <sup>4,5</sup> , fisheries related tourism <sup>2</sup> , water supply <sup>2</sup> , traditional food resources as seasonality changes and becomes unpredictable <sup>6</sup> ;<br>Potential positive benefits to tourism due to longer summers <sup>2,7</sup> .                                                                                                                                                                                                                               |    | Low              |
| Precipitation           | Average annual precipitation may increase by 6% (-1% to 10%) by 2050 and 8% (1% to 16%) by 2080 <sup>1</sup> ; ~10% decrease in summer <sup>1</sup> ; up ~15% more (low emissions RCP2.6) and ~21% (high emissions, RCP8.5) by 2091-2100 (relative to 1961-1990) <sup>3</sup> ;<br>Winter snowfall may decrease by -25% (-42% to -8%) by 2050 and -33% (-59% to -13%) by 2080 <sup>1</sup> ;<br>Stronger Vancouver Island Coastal Current <sup>8</sup> .                                                                                                               | High             | Threats to fish stocks due to lower stream flows and decreased summer precipitation <sup>4</sup> ;<br>Potential damaging impacts on ecosystems, ecosystem dynamics, habitats and altered current patterns <sup>2,9</sup> .                                                                                                                                                                                                                                                                                                                                               |    | High             |
| Sea Level Rise          | Sea level may rise from 0.6m to 0.9m by 2100 <sup>8</sup> .                                                                                                                                                                                                                                                                                                                                                                                                                                                                                                            | High             | Threats to cultural and heritage resources <sup>7,9</sup> , traditional food sources <sup>7,9</sup> , docking and processing infrastructure <sup>7</sup> , access to, or loss of natural recreation and tourism assets <sup>7</sup> , marine infrastructure, operations and transportation lanes <sup>7</sup> .                                                                                                                                                                                                                                                          |    | High             |
| Sea Surface Temperature | Average sea surface temperature to be ~11°C with RCP 2.6 and ~14°C with RCP 8.5 by 2091-2100 compared to 1961-1990 baseline <sup>1</sup> ;<br>Increasing sea surface temperature by ~1.8°C and average temperature to be ~11-13°C by 2065-2078 compared to 1995-2008 baseline <sup>8</sup> .                                                                                                                                                                                                                                                                           | High             | Threats and changes to aquaculture productivity <sup>7</sup> , marine species distributions <sup>5,12</sup> , marine food resources for local communities <sup>7,12</sup> ;<br>Potential positive effect on tourism due to warm water temperatures <sup>7</sup> ;<br>Poleward species range shifts at a rate of 10-18 km/decade <sup>12</sup> to 30.1 ± 2.34 (S.E.) km per decade from 2000 to 2050 <sup>5</sup> ;<br>Economic impacts on communities due to changes in fish species and abundance <sup>7</sup> .                                                        |    | Medium           |
| Ocean Acidification     | Average ~7.95 pH with RCP 2.6 and ~7.68 pH unit with RCP 8.5 by 2091-2100 <sup>1</sup> ;<br>Decreasing ocean pH levels (increasing ocean acidification) <sup>7</sup> .                                                                                                                                                                                                                                                                                                                                                                                                 | Medium           | Threats to habitats and ecosystems <sup>7,10</sup> , calcifying organisms <sup>7,10</sup> , aquaculture industry <sup>7,10</sup> , food web structure <sup>7,10</sup> , species composition <sup>7,10</sup> , reproductive and recruitment success <sup>7,10</sup> , timing of growth and development stages <sup>7,10</sup> , prey availability <sup>7,10</sup> .                                                                                                                                                                                                       |  | Medium           |
| Oxygenation             | Declining dissolved oxygen levels <sup>7</sup> .                                                                                                                                                                                                                                                                                                                                                                                                                                                                                                                       | Low              | Threats to availability of food resources <sup>7</sup> , habitat range of species that tolerate low oxygen habitats; negative impacts to fisheries productivity <sup>10,11</sup> .                                                                                                                                                                                                                                                                                                                                                                                       |  | High             |
| Streamflow              |                                                                                                                                                                                                                                                                                                                                                                                                                                                                                                                                                                        |                  |                                                                                                                                                                                                                                                                                                                                                                                                                                                                                                                                                                          |                                                                                       |                  |
| Sea Surface Salinity    | Likely declining sea surface salinity by ~1.5% with RCP 2.6 and ~3% with RCP 8.5 by 2091-2100 compared to 1961-1990 baseline <sup>3</sup> ;<br>Declining sea surface salinity by ~1% by 2065-2078 compared to 1995-2008 baseline <sup>8</sup> ;<br>~9% decrease in sea surface salinity at the mouth of the Homathko River <sup>8</sup> ;<br>~2.5% increase in sea salinity (~0.6 increase in psu unit) at Johnstone Strait by Port Neville <sup>8</sup> .                                                                                                             | High             | Threats to reproduction of seagrasses <sup>9</sup> , the availability of marine derived food resources <sup>7,10</sup> .                                                                                                                                                                                                                                                                                                                                                                                                                                                 |  | Low              |
| Winds, Waves and Storms | Increasing frequency and intensity of storms and storm surge, flooding as mean sea level increases <sup>2,4,7</sup> ; estimated 75.3cm storm surge height for a 100-year storm surge event <sup>11</sup> .                                                                                                                                                                                                                                                                                                                                                             | High             | Threats to ecosystems and habitats <sup>2</sup> , docking and fisheries processing infrastructure <sup>7</sup> , traditional harvesting practices due to unpredictable seasonality <sup>6</sup> .                                                                                                                                                                                                                                                                                                                                                                        |  | Low              |
| General                 | Increasing intensity of cumulative climate impacts <sup>7,9,10</sup> .                                                                                                                                                                                                                                                                                                                                                                                                                                                                                                 | Medium           | Threats to access to traditional foods <sup>6,7,12</sup> , biodiversity <sup>10</sup> , species abundance and distribution <sup>5,12</sup> , catch potential for all commercial fisheries <sup>12</sup> , resource conservation due to ecosystem stress <sup>7</sup> , tourism and wildlife viewing opportunities as species distribution and habitat change <sup>7</sup> ;<br>Northward shift in species range and abundance <sup>12</sup> ;<br>Health and economic implications for coastal communities due to altered access to traditional foods <sup>6,7,12</sup> . |  | Low              |

<sup>a</sup> Unless indicated, all sectoral impacts are negative

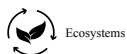

Ecosystems

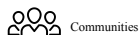

Communities

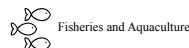

Fisheries and Aquaculture

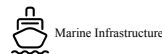

Marine Infrastructure

- 1 PCIC, Plan2Adapt: Summary of Climate Change for Stratcon 2050s & 2080s, Pacific Climate Impacts Consortium. <https://pacificclimate.org/analysis-tools/plan2adapt> (Accessed December 1, 2017).
- 2 PCIC, Climate summary for West Coast Region, Pacific Climate Impacts Consortium, Victoria, BC, 2013. [https://www.pacificclimate.org/sites/default/files/publications/Climate\\_Summary-West\\_Coast.pdf](https://www.pacificclimate.org/sites/default/files/publications/Climate_Summary-West_Coast.pdf)
- 3 [IPCC WG5]. Canadian Centre for Climate Modelling and Analysis, Environment Canada, 2013. <https://www.canada.ca/en/environment-climate-change/services/climate-change/centre-modelling-analysis.html>
- 4 J.R. Christian, M.G.G. Foreman, Climate Trends and Projections for the Pacific Large Aquatic Basin, Can. Tech. Rep. Fish. Aquat. Sci. 3032, 2013.
- 5 W.W.L. Cheung, V.W.Y. Lam, J.L. Sarmiento, K. Kearney, R. Watson, D. Pauly, Projecting global marine biodiversity impacts under climate change scenarios, Fish and Fisheries. 10 (2009) 235–251. doi:10.1111/j.1467-2979.2008.00315.x.
- 6 M.G. Reid, C. Hamilton, S.K. Reid, W. Trousdale, C. Hill, N. Turner, et al., Indigenous Climate Change Adaptation Planning Using a Values-Focused Approach: A Case Study with the Gitga'at Nation, Journal of Ethnobiology. 34 (2014) 401–424.
- 7 MaPP, Climate Change Commitments from MaPP Sub-Regional Marine Plans and the Regional Action Framework (RAF), Marine Plan Partnership, 2016.
- 8 M.G.G. Foreman, W. Callendar, D. Masson, J. Morrison, I. Fine, A Model Simulation of Future Oceanic Conditions along the British Columbia Continental Shelf. Part II: Results and Analyses, Atmosphere-Ocean. 52 (2014) 20–38. doi:10.1080/07055900.2013.873014
- 9 J.M. Kershner, R.M. Gregg, K. Feifel, Climate Change Vulnerability Maps for the North Pacific Coast of British Columbia: Implications for Coastal and Marine Spatial Planning, EcoAdapt, Bainbridge Island, WA, 2014.
- 10 T.A. Okey, H.M. Alidina, V. Lo, A. Montenegro, S. Jessen, Climate Change Impacts and Vulnerabilities in Canada's Pacific Marine Ecosystems, CPAWS BC and WWF-Canada, Vancouver, BC, 2012.
- 11 T.A. Okey, H.M. Alidina, V. Lo, S. Jessen, Effects of climate change on Canada's Pacific marine ecosystems: a summary of scientific knowledge, Rev Fish Biol Fisheries. 24 (2014) 519–559. doi:10.1007/s11160-014-9342-1.
- 12 L.V. Weatherdon, Y. Ota, M.C. Jones, D.A. Close, W.W.L. Cheung, Projected Scenarios for Coastal First Nations' Fisheries Catch Potential under Climate Change: Management Challenges and Opportunities, PLoS ONE. 11 (2016) e0145285. doi:10.1371/journal.pone.0145285
- 13 D.S. Abeyirigunawardena, D.J. Smith, B. Taylor, Extreme Sea Surge Responses to Climate Variability in Coastal British Columbia, Canada, Annals of the Association of American Geographers. 101 (2011) 992–1010. doi:10.1080/00045608.2011.585929.

Central Coast - Summary table for climate impacts, projected changes and sectoral impacts

| Climate Impact          | Projected Changes                                                                                                                                                                                                                                                                                                                                                                                                                                                                                                                                                                                                   | Evidence Quality | Sectoral Impacts                                                                                                                                                                                                                                                                                                                                                                                                                  | Impacts Summary <sup>a</sup>                                                                                                                                                                                                                                            | Evidence Quality |
|-------------------------|---------------------------------------------------------------------------------------------------------------------------------------------------------------------------------------------------------------------------------------------------------------------------------------------------------------------------------------------------------------------------------------------------------------------------------------------------------------------------------------------------------------------------------------------------------------------------------------------------------------------|------------------|-----------------------------------------------------------------------------------------------------------------------------------------------------------------------------------------------------------------------------------------------------------------------------------------------------------------------------------------------------------------------------------------------------------------------------------|-------------------------------------------------------------------------------------------------------------------------------------------------------------------------------------------------------------------------------------------------------------------------|------------------|
| Air Temperature         | <p>Increasing average air temperatures by 1.6°C (0.9°C to 2.4°C) by 2050 and 2.4°C (1.3°C to 3.7°C) by 2080<sup>1,2</sup>;</p> <p>Average air temperatures may reach be ~7°C with low emission scenario (RCP 2.6) and ~11°C with high emission scenario (RCP 8.5) by 2091-2100<sup>3</sup>;</p> <p>Growing degree days: +287 (+171 to +425) by 2050 and +466 (+255 to +747) by 2080<sup>1</sup>;</p> <p>Frost free days: +27(+13 to +39) by 2050 and +38 (+20 to +60) by 2080<sup>1</sup>;</p> <p>Increasing winter minimum temperatures by 4-9°C and summer maximum temperatures by 3-4°C by 2080<sup>1</sup>.</p> | High             | <p>Threats to fisheries<sup>2</sup>, fisheries related tourism<sup>2</sup>, water supply<sup>2</sup>;</p> <p>Potential benefits to tourism due to longer warm seasons<sup>2</sup>;</p> <p>Potential increases in energy requirements for heating and cooling<sup>4</sup>.</p>                                                                                                                                                     | 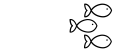<br>                                                                                              | Medium           |
| Precipitation           | <p>Increasing average annual precipitation by 5% (0% to 11%) by 2050 and 9% (3% to 18%) by 2080, ~10% decrease in summer<sup>1,2</sup>;</p> <p>Decreasing winter snowfall by -23% (-40% to -6%) by 2050 and -30% (-60% to -12%) by 2080<sup>1</sup>;</p> <p>Increasing average precipitation by ~15% with RCP 2.6 and ~29% with RCP 8.5 by 2091-2100 compared to 1961-1990 baseline<sup>3</sup>.</p>                                                                                                                                                                                                                | High             | <p>Threats on fisheries due to increases in fresh water input and associated changes in salinity levels<sup>4</sup>;</p> <p>Potential damaging impacts on ecosystems and habitats<sup>2</sup>;</p> <p>Changes in access and seasonality of traditional food availability<sup>2</sup>.</p>                                                                                                                                         | <br>                                                                                              | High             |
| Sea Level Rise          | <p>Sea level rise from 0.75m to a little over 1m. Areas in the northern parts to experience a greater increase; ~1m<sup>7</sup>.</p>                                                                                                                                                                                                                                                                                                                                                                                                                                                                                | Low              | <p>Threats to cultural and heritage resources and traditional food sources<sup>5,7</sup>, water quality and availability<sup>5</sup>, fisheries industry<sup>4</sup>, marine infrastructure, operations and transportation lanes<sup>5</sup>;</p> <p>Reduced access to, or loss of natural recreation and tourism assets<sup>5</sup>;</p> <p>Economic impacts on communities due to changes in fisheries<sup>5</sup>.</p>         | <br><br>       | Low              |
| Sea Surface Temperature | <p>Average sea surface temperature to be ~11°C with RCP 2.6 and ~14°C with RCP 8.5 by 2091-2100 compared to 1961-1990 baseline<sup>3</sup>;</p> <p>Increases in sea surface temperature by ~1.9°C and average temperature to be ~11-12.5°C by 2065-2078 compared to 1995-2008 baseline<sup>8</sup>.</p>                                                                                                                                                                                                                                                                                                             | High             | <p>Threats on fisheries industry<sup>5</sup>;</p> <p>Economic impacts on communities due to changes in fishery species abundance and distribution<sup>5,9</sup>.</p>                                                                                                                                                                                                                                                              | <br>                                                                                              | Medium           |
| Ocean Acidification     | <p>Average ~7.95 ph unit with RCP 2.6 and ~7.68 ph unit with RCP 8.5 by 2091-2100 compared to 1961-1990 baseline<sup>3</sup>;</p> <p>Decrease in pH levels will increase ocean acidity<sup>2</sup>.</p>                                                                                                                                                                                                                                                                                                                                                                                                             | Medium           | <p>Threats to calcifying organisms<sup>5,8</sup>, aquaculture industry<sup>5,8</sup>, larger scale ecosystems<sup>5,8</sup>;</p> <p>Economic impacts on communities due to changes in fisheries<sup>5,8</sup>.</p>                                                                                                                                                                                                                | <br>                                                                                          | Medium           |
| Oxygenation             | <p>Decreases in dissolved oxygen levels<sup>3</sup>.</p>                                                                                                                                                                                                                                                                                                                                                                                                                                                                                                                                                            | Low              | <p>Threats to fisheries industry<sup>4</sup>, the habitat range of species that tolerate low oxygen habitats<sup>5</sup>;</p> <p>Economic impacts on communities due to changes in fisheries<sup>5</sup>.</p>                                                                                                                                                                                                                     | <br>                                                                                          | Medium           |
| Streamflow              |                                                                                                                                                                                                                                                                                                                                                                                                                                                                                                                                                                                                                     |                  |                                                                                                                                                                                                                                                                                                                                                                                                                                   |                                                                                                                                                                                                                                                                         |                  |
| Sea Surface Salinity    | <p>Declining sea surface salinity by ~1.5% with RCP 2.6 and ~3% with RCP 8.5 by 2091-2100 compared to 1961-1990 baseline<sup>1</sup>;</p> <p>Declining sea surface salinity by ~1% (~0.2 decrease in psu unit) by 2065-2078 compared to 1995-2008 baseline<sup>6</sup>,</p> <p>~4% increase in sea surface salinity (~0.8 increase in psu unit) around Penrose Island<sup>6</sup>,</p> <p>~1% increase in sea surface salinity (~0.5 increase in psu unit) around Klemtu to Butedale<sup>6</sup>.</p>                                                                                                               | High             | <p>Impacts on ecosystems and habitats<sup>4</sup>, fisheries<sup>6</sup>;</p> <p>Economic impacts on communities associated with impacts on fisheries<sup>4,9</sup>.</p>                                                                                                                                                                                                                                                          | <br>                                                                                          | High             |
| Winds, Waves and Storms | <p>Increasing frequency and severity of storm events<sup>2,5</sup>.</p>                                                                                                                                                                                                                                                                                                                                                                                                                                                                                                                                             | Medium           | <p>Threats to ecosystems and habitats<sup>2</sup>, water quality and availability for communities<sup>4</sup>, marine infrastructure, operations and transportation lanes<sup>4</sup>;</p> <p>Impacts on climate-sensitive sectors such as tourism and fisheries<sup>5</sup>.</p>                                                                                                                                                 | <br><br> | Medium           |
| General                 | <p>Increasing intensity of cumulative climate impacts<sup>3,8</sup>.</p>                                                                                                                                                                                                                                                                                                                                                                                                                                                                                                                                            | High             | <p>Threats to access to traditional foods<sup>5,9</sup>, biodiversity<sup>9</sup>, species abundance and distribution<sup>9</sup>, catch potential for all commercial fisheries<sup>9</sup>, resource conservation due to ecosystem stress<sup>5</sup>, tourism and wildlife viewing opportunities as species distribution and habitat change<sup>5</sup>;</p> <p>Northward shift in species range and abundance<sup>9</sup>.</p> | <br><br> | High             |

<sup>a</sup> Unless indicated, all sectoral impacts are negative

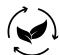

Ecosystems

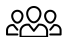

Communities

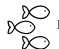

Fisheries and Aquaculture

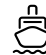

Marine Infrastructure

- 1 PCIC, Plan2Adapt: Summary of Climate Change for Central Coast 2050s & 2080s, Pacific Climate Impacts Consortium. <https://pacificclimate.org/analysis-tools/plan2adapt> (Accessed December 1, 2017).
- 2 PCIC, Climate summary for West Coast Region, Pacific Climate Impacts Consortium, Victoria, BC, 2013. [https://www.pacificclimate.org/sites/default/files/publications/Climate\\_Summary-West\\_Coast.pdf](https://www.pacificclimate.org/sites/default/files/publications/Climate_Summary-West_Coast.pdf)
- 3 [IPCC WG5]. Canadian Centre for Climate Modelling and Analysis, Environment Canada, 2013. <https://www.canada.ca/en/environment-climate-change/services/climate-change/centre-modelling-analysis.html>
- 4 D.L. Spittlehouse, Climate Change, Impacts and Adaptation Scenarios: Climate Change and Forest and Range Management in British Columbia, British Columbia Ministry of Forests and Range Forest Science, 2008.
- 5 MaPP, Climate Change Commitments from MaPP Sub-Regional Marine Plans and the Regional Action Framework (RAF), Marine Plan Partnership, 2016.
- 6 M.G.G. Foreman, W. Callendar, D. Masson, J. Morrison, I. Fine, A Model Simulation of Future Oceanic Conditions along the British Columbia Continental Shelf. Part II: Results and Analyses, *Atmosphere-Ocean*. 52 (2014) 20–38. doi:10.1080/07055900.2013.873014.
- 7 J.M. Kershner, R.M. Gregg, K. Feifel, Climate Change Vulnerability Maps for the North Pacific Coast of British Columbia: Implications for Coastal and Marine Spatial Planning, EcoAdapt, Bainbridge Island, WA, 2014.
- 8 T.A. Okey, H.M. Alidina, V. Lo, A. Montenegro, S. Jessen, Climate Change Impacts and Vulnerabilities in Canada's Pacific Marine Ecosystems, CPAWS BC and WWF-Canada, Vancouver, BC, 2012.
- 9 L.V. Weatherdon, Y. Ota, M.C. Jones, D.A. Close, W.W.L. Cheung, Projected Scenarios for Coastal First Nations' Fisheries Catch Potential under Climate Change: Management Challenges and Opportunities, *PLoS ONE*. 11 (2016) e0145285.

North Coast - Summary table for climate impacts, projected changes and sectoral impacts

| Climate Impact          | Projected Changes                                                                                                                                                                                                                                                                                                                                                                                                                                                                                                                                                                                                                                                                  | Evidence Quality | Sectoral Impacts                                                                                                                                                                                                                                                                                                                                                                                                                                                                                                      | Impacts Summary <sup>a</sup> | Evidence Quality |
|-------------------------|------------------------------------------------------------------------------------------------------------------------------------------------------------------------------------------------------------------------------------------------------------------------------------------------------------------------------------------------------------------------------------------------------------------------------------------------------------------------------------------------------------------------------------------------------------------------------------------------------------------------------------------------------------------------------------|------------------|-----------------------------------------------------------------------------------------------------------------------------------------------------------------------------------------------------------------------------------------------------------------------------------------------------------------------------------------------------------------------------------------------------------------------------------------------------------------------------------------------------------------------|------------------------------|------------------|
| Air Temperature         | <p>Average air temperature may increase by 1.7°C (1.1°C to 2.5°C) by 2050 and 2.6°C (1.5°C to 4.3°C) by 2080<sup>1,2</sup>; and average temperatures may reach ~7.5°C with low emission scenario (RCP 2.6) and ~11.5°C with high emission scenario (RCP 8.5) by 2091-2100<sup>3</sup>;</p> <p>Likely more growing degree days: 237 (+150 to +369) growing degree days by 2050 and +362 (+213 to +700) by 2080<sup>1</sup>;</p> <p>Likely more frost free days: +24 (+13 to +36) frost free days by 2050 and +37 (+18 to +58) by 2080<sup>1</sup>;</p> <p>Higher winter minimum temperatures (4–9°C higher) and summer maximum temperatures (3–4°C higher) by 2080<sup>1</sup>.</p> | High             | <p>Higher energy requirements for heating and cooling<sup>3</sup>;</p> <p>Lower water availability<sup>2</sup>.</p>                                                                                                                                                                                                                                                                                                                                                                                                   |                              | Medium           |
| Precipitation           | <p>Annual precipitation may increase by 7% (3% to 12%) by 2050 and 12% (7% to 22%) by 208, in all seasons except summer<sup>1,2</sup>; up to ~18% more precipitation with low emissions (RCP2.6) and ~25% more with RCP 8.5 by 2091-2100 compared to 1961-1990 baseline<sup>6</sup>;</p> <p>Winter snowfall may decrease by -10% (-18% to +5%) by 2050 and -11% (-32% to -1%) by 2080<sup>1</sup>;</p>                                                                                                                                                                                                                                                                             | High             | <p>Threats to ecosystems and habitats<sup>4</sup>, species abundance and/or distribution<sup>5</sup>, fisheries industry<sup>5,6</sup>, food security<sup>7</sup>, slope stability<sup>2</sup>, community safety due to increased risk of landslides<sup>2</sup>;</p> <p>Increases in fresh water input into oceans, associated impacts on fisheries<sup>6</sup>, freeze-thaw processes<sup>2</sup>.</p>                                                                                                              | <br>                         | High             |
| Sea Level Rise          | <p>Rising sea levels are likely: 0.6m to 1.2m. Areas in the northern parts may experience a greater increase ~1.2m<sup>7</sup>.</p>                                                                                                                                                                                                                                                                                                                                                                                                                                                                                                                                                | Medium           | <p>Threats to ecosystems and habitats<sup>4</sup>, species abundance and/or distribution<sup>4</sup>, fisheries industry<sup>5,6</sup>, cultural and heritage resources<sup>5,7</sup>, food security and traditional food sources<sup>5,7</sup>, marine infrastructure, operations and transportation lanes<sup>5</sup>, access to, or loss of natural recreation and tourism assets<sup>5</sup>;</p> <p>Increase in coastal erosion and associated impacts on communities and marine infrastructure<sup>8</sup>.</p> | <br>                         | Medium           |
| Sea Surface Temperature | <p>Increases in sea surface temperatures by ~2°C and average temperatures to be ~10-11.5°C by 2065-2078<sup>8</sup>; ~2.5°C increase in sea surface temperatures at the east of Dundas Islands<sup>6</sup>.</p>                                                                                                                                                                                                                                                                                                                                                                                                                                                                    | High             | <p>Threats to ecosystems and habitats<sup>4</sup>, species abundance and/or distribution<sup>5,10</sup>, fisheries industry<sup>5</sup>, food security<sup>5</sup>;</p> <p>Economic impacts on communities due to changes in fisheries and ecosystem health<sup>9</sup>.</p>                                                                                                                                                                                                                                          | <br>                         | Medium           |
| Ocean Acidification     | <p>Decreasing in pH levels leading to ocean acidification<sup>4</sup>.</p>                                                                                                                                                                                                                                                                                                                                                                                                                                                                                                                                                                                                         | Low              | <p>Threats to ecosystems and habitats<sup>5,9</sup>, species abundance and/or distribution<sup>5</sup>, fisheries industry<sup>5</sup>, calcifying organisms<sup>5,9</sup>, aquaculture industry<sup>5,9</sup>, commercial harvests<sup>5</sup>, food security<sup>5</sup>;</p> <p>Economic impacts on communities due to changes in fisheries and ecosystem health<sup>9</sup>.</p>                                                                                                                                  | <br>                         | Medium           |
| Oxygenation             | <p>Declining dissolved oxygen levels<sup>5</sup>.</p>                                                                                                                                                                                                                                                                                                                                                                                                                                                                                                                                                                                                                              | Low              | <p>Threats to ecosystems and habitats<sup>5</sup>, species abundance and/or distribution<sup>5</sup>, fisheries industry<sup>5</sup>, habitat range of species that tolerate low oxygen habitats<sup>5</sup>, commercial harvests<sup>5</sup>, food security<sup>5</sup>;</p> <p>Economic impacts on communities due to changes in fisheries and ecosystem health<sup>5</sup>.</p>                                                                                                                                    | <br>                         | Medium           |
| Streamflow              |                                                                                                                                                                                                                                                                                                                                                                                                                                                                                                                                                                                                                                                                                    |                  |                                                                                                                                                                                                                                                                                                                                                                                                                                                                                                                       |                              |                  |
| Sea Surface Salinity    | <p>Decreasing sea surface salinity by ~1% (-0.2 decrease in psu unit) by 2065-2078 compared to 1995-2008 baseline<sup>6</sup>, ~1.4% increase in sea surface salinity (-0.4 increase in psu unit) around the east of Dundas Islands<sup>6</sup>, ~8% decrease in sea surface salinity (-1.2 decrease in psu unit) around Larcom Island<sup>6</sup>, ~5% increase in sea surface salinity (-1.2 increase in psu unit) north east of Gil Island<sup>6</sup>.</p>                                                                                                                                                                                                                     | High             | <p>Threats to species abundance and/or distribution<sup>5,10</sup>, fisheries industry<sup>5</sup>, food security<sup>5</sup>;</p> <p>Economic impacts on communities due to changes in fisheries and ecosystem health<sup>5</sup>.</p>                                                                                                                                                                                                                                                                               |                              | Medium           |

|                         |                                                                                                 |        |                                                                                                                                                                                                                                                                                                                                                                                              |                                                                                     |        |
|-------------------------|-------------------------------------------------------------------------------------------------|--------|----------------------------------------------------------------------------------------------------------------------------------------------------------------------------------------------------------------------------------------------------------------------------------------------------------------------------------------------------------------------------------------------|-------------------------------------------------------------------------------------|--------|
| Winds, Waves and Storms | Increasing frequency and severity of storm events <sup>2,5</sup> .                              | Medium | <p>Threats to ecosystems and habitats<sup>5</sup>, species abundance and/or distribution<sup>5,10</sup>, fisheries harvests<sup>5</sup>, food security<sup>5</sup>;</p> <p>Economic impacts on communities due to changes in fisheries and ecosystem health<sup>7</sup>;</p> <p>Increase in coastal erosion and associated impacts on communities and marine infrastructure<sup>8</sup>.</p> |  | High   |
| General                 | Climate change effects are expected to become even more dramatic in coming years <sup>9</sup> . | High   | <p>Threats to species abundance and distribution<sup>10</sup>, catch potential for all commercial fisheries<sup>10</sup>, salmon catch potential<sup>10</sup>, access to traditional foods<sup>5,10</sup>;</p> <p>Northward shift in species range and abundance<sup>10</sup>;</p> <p>Economic, social and cultural impacts on communities due to salmon running later, berries</p>          |  | Medium |

<sup>α</sup> Unless indicated, all sectoral impacts are negative

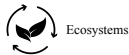

Ecosystems

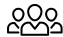

Communities

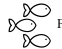

Fisheries and Aquaculture

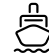

Marine Infrastructure

- 1 PCIC, Plan2Adapt: Summary of Climate Change for Kitimat-Stikine 2050s & 2080s, Pacific Climate Impacts Consortium. <https://pacificclimate.org/analysis-tools/plan2adapt> (Accessed December 1, 2017).
- 2 PCIC, Climate summary for Skeena Region, Pacific Climate Impacts Consortium, Victoria, BC, 2013. [https://www.pacificclimate.org/sites/default/files/publications/Climate\\_Summary-Skeena.pdf](https://www.pacificclimate.org/sites/default/files/publications/Climate_Summary-Skeena.pdf)
- 3 [IPCC WG5] Canadian Centre for Climate Modelling and Analysis, Environment Canada, 2013. <https://www.canada.ca/en/environment-climate-change/services/climate-change/centre-modelling-analysis.html>
- 4 D.L. Spittlehouse, Climate Change, Impacts and Adaptation Scenarios: Climate Change and Forest and Range Management in British Columbia, British Columbia Ministry of Forests and Range Forest Science, 2008.
- 5 MaPP, Climate Change Commitments from MaPP Sub-Regional Marine Plans and the Regional Action Framework (RAF), Marine Plan Partnership, 2016.
- 6 M.G.G. Foreman, W. Callendar, D. Masson, J. Morrison, I. Fine, A Model Simulation of Future Oceanic Conditions along the British Columbia Continental Shelf. Part II: Results and Analyses, Atmosphere-Ocean. 52 (2014) 20–38. doi:10.1080/07055900.2013.873014.
- 7 J.M. Kershner, R.M. Gregg, K. Feifel, Climate Change Vulnerability Maps for the North Pacific Coast of British Columbia: Implications for Coastal and Marine Spatial Planning, EcoAdapt, Bainbridge Island, WA, 2014.
- 8 D.S. Abeyasingunawardena, I.J. Walker, Sea level responses to climatic variability and change in northern British Columbia, Atmosphere-Ocean. 46 (2008) 277–296. doi:10.3137/ao.460301.
- 9 T.A. Okey, H.M. Alidina, V. Lo, S. Jessen, Effects of climate change on Canada's Pacific marine ecosystems: a summary of scientific knowledge, Rev Fish Biol Fisheries. 24 (2014) 519–559. doi:10.1007/s11160-014-9342-1.
- 10 L.V. Weatherdon, Y. Ota, M.C. Jones, D.A. Close, W.W.L. Cheung, Projected Scenarios for Coastal First Nations' Fisheries Catch Potential under Climate Change: Management Challenges and Opportunities, PLoS ONE. 11 (2016) e0145285.
- 11 R. Anderson, Kitkatla: Climate Change and Adaptations & Diet and Diabetes - Final Fieldwork Report, Forests and Oceans for the Future, University of British Columbia, 2005.

Haida Gwaii - Summary table for climate impacts, projected changes and sectoral impacts

| Climate Impact          | Projected Changes                                                                                                                                                                                                                                                                                                                                                                                                                                                                                                                                                                                                                                                                                                                                                                                                               | Evidence Quality | Sectoral Impacts                                                                                                                                                                                                                                                                                                                                                                                                                                                                                                  | Impacts Summary*                                                                                                                                                                                                                                                  | Evidence Quality |
|-------------------------|---------------------------------------------------------------------------------------------------------------------------------------------------------------------------------------------------------------------------------------------------------------------------------------------------------------------------------------------------------------------------------------------------------------------------------------------------------------------------------------------------------------------------------------------------------------------------------------------------------------------------------------------------------------------------------------------------------------------------------------------------------------------------------------------------------------------------------|------------------|-------------------------------------------------------------------------------------------------------------------------------------------------------------------------------------------------------------------------------------------------------------------------------------------------------------------------------------------------------------------------------------------------------------------------------------------------------------------------------------------------------------------|-------------------------------------------------------------------------------------------------------------------------------------------------------------------------------------------------------------------------------------------------------------------|------------------|
| Air Temperature         | <p>Average air temperatures may increase by 1.4°C (0.8°C to 2.2°C) by 2050 and 2.2°C (1.1°C to 3.5°C) by 2080<sup>1,2</sup>;</p> <p>South Haida Gwaii: Average air temperatures may reach ~7.5°C with low emission scenario (RCP 2.6) and ~11.5°C with high emission scenario (RCP 8.5) by 2091-2100<sup>3</sup>;</p> <p>North Haida Gwaii: Average air temperatures may reach ~8.5°C with low emission scenario (RCP 2.6) and ~12°C with high emission scenario (RCP 8.5) by 2091-2100<sup>3</sup>;</p> <p>Growing degree days: +317 (+182 to +506) by 2050 and +514 (+264 to +855) by 2080<sup>4</sup>;</p> <p>Frost free days: +22 (+13 to +31) by 2050 and +32 (+18 to +46) by 2080<sup>4</sup>;</p> <p>Increases in winter minimum temperatures by 4-9°C by 2080 and summer maximum temperatures by 3-4°C<sup>4</sup>.</p> | High             | <p>Threats to fisheries<sup>5</sup>, fisheries related tourism<sup>2</sup>, water supply<sup>2</sup>;</p> <p>Potential positive benefits to tourism due to warmer and longer summer season<sup>2</sup>.</p>                                                                                                                                                                                                                                                                                                       | 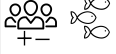                                                                                                                                                                               | High             |
| Precipitation           | <p>Increases in average annual precipitation by 7% (0% to 10%) by 2050 and 9% (4% to 17%) by 2080, and ~10% decrease in summer<sup>1,2</sup>;</p> <p>Decreasing winter snowfall by ~35% (-54% to -11%) by 2050 and ~48% (-72% to -22%) by 2080<sup>1</sup>;</p> <p>South Haida Gwaii: Increasing average precipitation by ~18% (low emissions, RCP2.6) and ~25% (high emissions, RCP8.5) by 2091-2100 compared to 1961-1990 baseline<sup>1</sup>;</p> <p>North Haida Gwaii: Increasing average precipitation by ~20% (low emissions, RCP2.6) and ~22% (high emissions, RCP8.5) by 2091-2100 compared to 1961-1990 baseline<sup>1</sup>.</p>                                                                                                                                                                                     | High             | <p>Potential damaging impacts on ecosystems and habitats<sup>2</sup>;</p> <p>Changes in access and seasonality of traditional foods<sup>2</sup>.</p>                                                                                                                                                                                                                                                                                                                                                              |                                                                                             | High             |
| Sea Level Rise          | <p>Extreme low projections of 0.1-0.31m, mean projections of 0.25 - 0.46m, extreme high projections of 0.95-1.16m<sup>3</sup>;</p> <p>Average sea level may increase by 0.7-1.32m. North and northwest coast may experience ~1.32m, northeast and the southwest coast may experience ~1-1.2m<sup>6</sup>.</p>                                                                                                                                                                                                                                                                                                                                                                                                                                                                                                                   | Medium           | <p>Threats to cultural and historic sites<sup>5</sup>, coastal development and settlements due to flooding and erosion<sup>7,8</sup>, marine infrastructure due to flooding and erosion<sup>7,8</sup>, ecosystem health, resilience and productivity as well as coastal habitats, loss of wetlands and pollution<sup>1</sup>;</p> <p>Ecological, economic, social and technological impacts and adaptation challenges<sup>8</sup>.</p>                                                                            |          | Medium           |
| Sea Surface Temperature | <p>South Haida Gwaii: Average sea surface temperature to be ~11.75°C with RCP 2.6 and ~14°C with RCP 8.5 by 2091-2100 compared to 1961-1990 baseline<sup>1</sup>;</p> <p>Increasing sea surface temperature by up to 1.5°C in less than 100 years<sup>5</sup>, or by ~2.1°C compared to 1995-2008 baseline<sup>9</sup>; average temperature to be ~10.5-12.5°C by 2065-2078<sup>9</sup>.</p>                                                                                                                                                                                                                                                                                                                                                                                                                                    | High             | <p>Potential positive benefits to seagrasses and the kelp species <i>Macrocystis</i> spp.<sup>5</sup>;</p> <p>Impacts on a variety of marine species<sup>5</sup>.</p>                                                                                                                                                                                                                                                                                                                                             |                                                                                         | High             |
| Ocean Acidification     | <p>Decreasing ocean pH levels. South Haida Gwaii: Average ~7.96 ph unit with RCP 2.6 and ~7.69 ph unit with RCP 8.5 by 2091-2100 compared to 1961-1990 baseline<sup>1</sup>.</p>                                                                                                                                                                                                                                                                                                                                                                                                                                                                                                                                                                                                                                                | High             | <p>Threats to calcifying organisms<sup>9</sup>, aquaculture industry<sup>5,8</sup>, larger scale ecosystem effects<sup>5,8</sup>;</p> <p>Economic impacts on communities due to impacts on aquaculture and potential impacts on fisheries<sup>5,8</sup>.</p>                                                                                                                                                                                                                                                      |    | Medium           |
| Oxygenation             | <p>Declining ocean oxygen levels<sup>9</sup>.</p>                                                                                                                                                                                                                                                                                                                                                                                                                                                                                                                                                                                                                                                                                                                                                                               | High             | <p>Impacts on ecosystems and habitats due to decreased salinity levels<sup>5</sup>, fisheries due to increases in fresh water input and associated changes in salinity levels<sup>9</sup>.</p>                                                                                                                                                                                                                                                                                                                    |                                                                                         | High             |
| Streamflow              | <p>Changing timing of streamflow - earlier fresher, less snowpack, higher water volume earlier in spring<sup>8</sup>.</p>                                                                                                                                                                                                                                                                                                                                                                                                                                                                                                                                                                                                                                                                                                       | Low              | <p>Threats on salmon migration, spawning, and incubation<sup>8</sup>.</p>                                                                                                                                                                                                                                                                                                                                                                                                                                         |                                                                                                                                                                              | Low              |
| Sea Surface Salinity    | <p>South Haida Gwaii: Decreasing sea surface salinity by ~1% with RCP 2.6 and ~3.4% with RCP 8.5 by 2091-2100 compared to 1961-1990 baseline<sup>1</sup>;</p> <p>Decreasing sea surface salinity by less than 1% (-0.3 decrease in psu unit) by 2065-2078 compared to 1995-2008 baseline<sup>9</sup>, ~5% decrease in sea surface salinity (-1.2 decrease in psu unit) around Masset Inlet<sup>9</sup>.</p>                                                                                                                                                                                                                                                                                                                                                                                                                     | High             | <p>Impacts on ecosystems and habitats due to decreased salinity levels<sup>5</sup>, fisheries due to increases in fresh water input and associated changes in salinity levels<sup>9</sup>.</p>                                                                                                                                                                                                                                                                                                                    |                                                                                         | High             |
| Winds, Waves and Storms | <p>Stronger future storm events<sup>10</sup> and increases in storm surge frequency<sup>2</sup>.</p>                                                                                                                                                                                                                                                                                                                                                                                                                                                                                                                                                                                                                                                                                                                            | High             | <p>Threats to ecosystems and habitats<sup>2</sup>, coastal development and settlements due to flooding and erosion<sup>2,8</sup>, marine infrastructure and flood protection infrastructure due to severe weather events and associated wave and erosion damage<sup>2,7,8</sup>, critical infrastructure such as utility lines, power, communications transmissions, and access to grocery and other supplies<sup>11</sup>, marine and land transportation lanes due to severe weather events<sup>8,11</sup>.</p> |    | High             |
| General                 | <p>Increasing intensity of cumulative climate change impacts<sup>5</sup>.</p>                                                                                                                                                                                                                                                                                                                                                                                                                                                                                                                                                                                                                                                                                                                                                   | High             | <p>Threats to species abundance and distribution<sup>12</sup>, catch potential for all commercial fisheries<sup>12</sup>, salmon catch potential<sup>12</sup>, access to traditional foods<sup>5,12</sup>;</p> <p>Northward shift in species range and abundance<sup>12</sup>.</p>                                                                                                                                                                                                                                |                                                                                         | High             |

\* Unless indicated, all sectoral impacts are negative

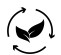

Ecosystems

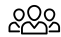

Communities

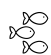

Fisheries and Aquaculture

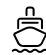

Marine Infrastructure

- 1 PCIC, Plan2Adapt: Summary of Climate Change for Skeena-Queen Charlotte 2050s & 2080s, Pacific Climate Impacts Consortium. <https://pacificclimate.org/analysis-tools/plan2adapt> (Accessed December 1, 2017).
- 2 PCIC, Climate summary for West Coast Region, Pacific Climate Impacts Consortium, Victoria, BC, 2013. [https://www.pacificclimate.org/sites/default/files/publications/Climate\\_Summary-West\\_Coast.pdf](https://www.pacificclimate.org/sites/default/files/publications/Climate_Summary-West_Coast.pdf)
- 3 [IPCC WG5]. Canadian Centre for Climate Modelling and Analysis, Environment Canada, 2013. <https://www.canada.ca/en/environment-climate-change/services/climate-change/centre-modelling-analysis.html>
- 4 D.L. Spittlehouse, Climate Change, Impacts and Adaptation Scenarios: Climate Change and Forest and Range Management in British Columbia, British Columbia Ministry of Forests and Range Forest Science, 2008.
- 5 T.A. Okey, H.M. Alidina, V. Lo, S. Jessen, Effects of climate change on Canada's Pacific marine ecosystems: a summary of scientific knowledge, *Rev Fish Biol Fisheries*. 24 (2014) 519–559. doi:10.1007/s11160-014-9342-1.
- 6 J.M. Kershner, R.M. Gregg, K. Feifel, Climate Change Vulnerability Maps for the North Pacific Coast of British Columbia: Implications for Coastal and Marine Spatial Planning, *EcoAdapt*, Bainbridge Island, WA, 2014.
- 7 D.S. Abeyirigunawardena, L.J. Walker, Sea level responses to climatic variability and change in northern British Columbia, *Atmosphere-Ocean*. 46 (2008) 277–296. doi:10.3137/ao.460301.
- 8 MaPP, Climate Change Commitments from MaPP Sub-Regional Marine Plans and the Regional Action Framework (RAF), Marine Plan Partnership, 2016.
- 9 M.G.G. Foreman, W. Callendar, D. Masson, J. Morrison, I. Fine, A Model Simulation of Future Oceanic Conditions along the British Columbia Continental Shelf. Part II: Results and Analyses, *Atmosphere-Ocean*. 52 (2014) 20–38. doi:10.1080/07055900.2013.873014.
- 10 L.J. Walker, J.V. Barrie, Geomorphology and sea-level rise on one of Canada's most sensitive coasts: Northeast Graham Island, British Columbia, *Journal of Coastal Research*, Special Issue. 39:1 (2006) 220–226. doi:10.2307/25741565.
- 11 L.J. Walker, R. Sydneysmith, British Columbia, in: D.S. Lemmen, F.J. Warren, J. Lacroix, E. Bush (Eds.), *From Impacts to Adaptation Canada in a Changing Climate*, 2008: pp. 1–58.
- 12 L.V. Weatherdon, Y. Ota, M.C. Jones, D.A. Close, W.W.L. Cheung, Projected Scenarios for Coastal First Nations' Fisheries Catch Potential under Climate Change: Management Challenges and Opportunities, *PLoS ONE*. 11 (2016) e0145285.
